# Supplementary material for: Comparison of detection rate of 16 sampling methods for respiratory viruses: a Bayesian network meta-analysis of clinical data and systematic review
Source: HighWire-hosted journal article supplement (doi:10.1136/bmjgh-2020-003053), 2020-11-01
Supplement: bmjgh-2020-003053supp001_data_supplement.pdf [file bmjgh-2020-003053supp001_data_supplement.pdf]

Supplement Table 1. The characteristics of included studies

| Study ID                      | Country     | Study type | Date                    | Quality score | N. Cases | Age, Median)    | Gender (F/M) | Hospital              | Sampling time       | virus    | Methods            | Diagnosis of enrolled patients | Detective rates                  | Ranking        | Ref.(N.) |
|-------------------------------|-------------|------------|-------------------------|---------------|----------|-----------------|--------------|-----------------------|---------------------|----------|--------------------|--------------------------------|----------------------------------|----------------|----------|
| Larios et al., 2011[1]        | Canada      | C.T.       | Oct. 2008               | 7             | 60       | 41.1(Y/ Median) | 43/17        | Mount Sinai Hos.      | After symptom onset | RVs      | MTS/NPS (PCR)      | Acute respiratory illnesses    | 90%(MTS)/86% (NPS)               | MTS > NPS      | 17       |
| Wouters et al., 2019 [2]      | Belgium     | C.T.       | Inf. season 2015 – 2016 | 7             | 321      | NA              | 157/164      | Heilig Hart Hos. Lier | After symptom onset | INF/RS V | NPS/MTS(P CR)      | Influenza-like illness         | 48.5%(NPS)/46 .0%(MTS)           | NPS > MTS      | 11       |
| Abu-Dia b2008[3]              | Palestinian | C.T.       | Nov.20 06 - Jan. 2007   | 7             | 455      | 17.4 (M/Me an)  | 175/280      | Caritas Baby Hos.     | After symptom onset | RVs      | VTM-S /NPA (DFA)   | Viral respiratory infections   | 71.4%(NPA)/7 0.3%(VTM-S)         | VTM-S =NPA     | 16       |
| Fraze et al., 2017 [4]        | USA /Chile  | C.T.       | Inf.seas on 2015 - 2016 | 7             | 484      | 34(Y/M edian)   | 284/285      | NA                    | After symptom onset | INF      | NPS/MTS/N S(PCR)   | Influenza-like illness         | 98% ( MTS ) /84.4(NS)/93. 0(NPS) | MTS > NPS > NS | 44       |
| Ngaosuwankul et al., 2010 [5] | Thailand    | C.S.       | 2009 pande mic Inf.     | 5             | 29       | 12.9(Y/ Mean)   | NA           | Medicine Siriraj Hos. | After symptom onset | INF      | NPA/NS/TS (PCR)    | Respiratory viral infections   | 100%(NPA)/10 0%(NS)/86.2%( TS)   | NPA= NS > TS   | 15       |
| Irving et al., 2012           | USA         | C.T.       | Jan.- Mar.              | 7             | 240      | 60(Y/M edian)   | 151/89       | NA                    | After symptom onset | INF      | NS/NPS (PCR/cultur | Acute respiratory              | 88.6%(NS)/94. 3%(NPS)            | NS=NPS         | 15       |

|                           |           |      |                       |   |     |                 |         |                                                     |                     |     |                              |                              |                         |             |    |
|---------------------------|-----------|------|-----------------------|---|-----|-----------------|---------|-----------------------------------------------------|---------------------|-----|------------------------------|------------------------------|-------------------------|-------------|----|
| [6]                       |           |      | 2007                  |   |     |                 |         |                                                     | onset               | e)  | illnesses                    |                              |                         |             |    |
| Jin et al., 2014[7]       | China     | C.T. | Apr. -May 2013        | 6 | 35  | NA              | NA      | The 1st Affiliated Hospitals of Zhejiang University | After symptom onset | INF | Sputum/TS( IDA /Culture/PCR) | H7N9 infection               | 98.2%(Sputum)/62.2%(TS) | Sputum > TS | 18 |
| Ali et al., 2015[8]       | Canada    | C.T. | Sep.20 11 -Mar. 2013, | 6 | 83  | NA              | NA      | NA                                                  | After symptom onset | RVs | TS/NS(PCR)                   | Respiratory viral infections | 87.7%(NS)/71.4%(TS)     | NS > TS     | 17 |
| Bell et al., 2014[9]      | USA       | C.T. | Aug. 2009 -Jun. 2012  | 5 | 236 | NA              | NA      | Children's Mercy Hos.s and Clinics                  | After symptom onset | INF | MTS/NPW( culture/PCR )       | Influenza                    | 89.4%(NPW)/(87.1%(MTS)  | MTS=NPW     | 29 |
| Faden et al., 2010 [10]   | USA       | C.T. | Jan. -Mar. 2010       | 6 | 153 | NA              | NA      | Women and Children's Hos. of Buffalo                | After symptom onset | RVs | MTS/NPA(D FA)                | Respiratory viral infections | 93.4%(NPA)/93.2%(MTS)   | MTS=NPA     | 7  |
| Tabla et al., 2010[11]    | Spain     | C.T. | July -Dec. 2009       | 7 | 264 | 38(Y/M edian)   | 129/135 | the San Juan University Hos.                        | After symptom onset | INF | N-TS/NPA( PCR)               | Pandemic influenza           | 95%(N-TS)/85%(NPA)      | N-TS > NPA  | 18 |
| Lambert et al., 2014 [12] | Australia | C.S. | Jul. 2006-Aug. 2007   | 6 | 295 | 1.1(Y /Media n) | NA      | Royal Children ' s Hos.                             | After symptom onset | RVs | N-TS/NPA( PCR)               | Respiratory viral infections | 96.7%(NPA)/86.6%(N-TS)  | NPA > N-TS  | 24 |

|                            |          |      |                       |   |      |              |           |                                  |                     |                |                                      |                                   |                                          |                    |    |
|----------------------------|----------|------|-----------------------|---|------|--------------|-----------|----------------------------------|---------------------|----------------|--------------------------------------|-----------------------------------|------------------------------------------|--------------------|----|
| Holter et al.,2015 [13]    | Norway   | C.T. | Jan. 2008-Jan. 2011   | 6 | 267  | 66(Y/Median) | 127/140   | Drammen Hos.                     | After symptom onset | Resp.pathogens | NPS/OPS (antigen Test/culture / PCR) | Community-acquired pneumonia      | 59.1%(NPS)/86.4%(OPS)                    | OPS > NPS          | 44 |
| Lieberman et al.,2009 [14] | Israel   | C.T. | Jan.-Mar. 2004, et al | 8 | 550  | 63.9(Y/Mean) | 255/295   | Soroka Medical Center            | After symptom onset | RSV            | NPW/NPS/OPS(PCR)                     | Respiratory viral infections      | 54.2%(OPS)/7.3.3%(NPS)/84.9% (NPW)       | NPW > NPS > OPS    | 16 |
| Hernes et al.,2011 [15]    | Norway   | C.T. | Feb. 2008-Feb. 2009   | 7 | 223  | 74.9(Y/Mean) | 89/134    | Sorlandet Hos.                   | After symptom onset | RVs            | NPS/OPS(P CR)                        | Respiratory viral infections      | 72.2%(NPS)/64.8%(OPS)                    | NPS > OPS          | 29 |
| Hammit et al., 2011[16]    | UK       | C.T. | Oct. 2009 -Aug. 2010  | 6 | 533  | 18(M/Median) | 236/297   | Kilifi District Hos.             | After symptom onset | RVs            | NPS/OPS(P CR)                        | Lower respiratory tract Infection | 91.9%(NPS)/72.4%(OPS)                    | NPS > OPS          | 11 |
| Goyal et al., 2017[17]     | Thailand | C.S. | Feb. - Dec.2015       | 5 | 108  | 73(Y/Mean)   | 59/49     | NA                               | After symptom onset | INF            | NPS/NS(PC R)                         | Influenza                         | 87.5%(NS)/77.7%(NPS)                     | NPS=NS             | 20 |
| Kim et al., 2011[18]       | Kenya    | C.T. | Jun. 2009 -Aug. 2010  | 8 | 2331 | 1(Y/Median)  | 1074/1257 | Kenya Medical Research Institute | After symptom onset | INF            | NPS/OPS (PCR)                        | Respiratory viral infections      | 70.1%(NPS)/73.7%(OPS)                    | NPS=OPS            | 25 |
| Covalciuc et al., 1999[19] | USA      | C.T. | Jan. 1998 -Apr.       | 7 | 184  | NA           | NA        | NA                               | After symptom onset | INF            | NPS/Sputum/TS/NA(O IA/culture)       | Influenza                         | 88.4%(NA)/83.1%(NPS)/81.1% (Sputum)/62.1 | NPS/Sputum/NA > TS | 24 |

|                            |           |      |                         |   |      |                   |         |                                               |                     |                  |                            |                                   | %(TS)                           |                 |    |  |
|----------------------------|-----------|------|-------------------------|---|------|-------------------|---------|-----------------------------------------------|---------------------|------------------|----------------------------|-----------------------------------|---------------------------------|-----------------|----|--|
| Spyridaki et al., 2009[20] | Greece    | C.T. | 1998<br>NA              | 8 | 58   | 39.2 (Y/<br>Mean) | 35/23   | Amsterdam / Lodz/Oslo Hos.                    | After symptom onset | INF              | NS/NA/NB/<br>NW(PCR)       | Viral pathogens infection         | 79%(NA)/74%(NB)/77%(NS)/88%(NW) | NW > NS/NA > NB | 38 |  |
| TUNSD et al., 2015 [21]    | Norway    | C.S. | 2012/2013<br>RSV season | 6 | 81   | NA                | NA      | Akershus University Hos.                      | After symptom onset | Resp. pathog ens | NPS/NPA (PCR)              | Respiratory viral infections      | 71.2%(NPS)/67.2%(NPA)           | NPS=NPA         | 16 |  |
| Sung et al., 2008 [22]     | Hong Kong | C.T. | Nov. 2005 - Oct. 2006   | 7 | 475  | 23.8 (M/Me an)    | 222/253 | Prince of Wales Hos.                          | After symptom onset | RSV              | NPA/NS (PCR)               | Acute viral respiratory infection | 85.6%(NPA)/7.67%(NS)            | NPA=NS          | 10 |  |
| Mitamura et al., 2013[23]  | Japan     | C.S. | Dec.2010 - Mar. 2011    | 6 | 336  | NA                | NA      | Eiju General Hos.                             | After symptom onset | INF              | NPA/NPS/<br>NW(IFA)        | Pandemic influenza                | 97.3%(NPA)/9.19%(NPS)75.7%(NW)  | NPA/NPS > Nw    | 17 |  |
| Campbell et al., 2013[24]  | USA       | C.T. | NA                      | 6 | 146  | NA                | NA      | Seattle Children's Hos.                       | After symptom onset | RVs              | NS/NW(PC R)                | Respiratory viral infections      | 91.3%(NW)/85.8%(NS)             | NS=NW           | 22 |  |
| Masters et al., 1987 [25]  | USA       | C.S. | Winter - spring 1986    | 5 | 121  | NA                | NA      | University of Colorado Health Sciences Center | After symptom onset | RSV              | NPS/NPW (EIA/FAT/ Culture) | RSV infection                     | 44.1%(NPW)/2.17%(NPS)           | NPW > NPS       | 16 |  |
| Jeremiah et al.,           | USA       | C.T. | Dec. 2011-A             | 6 | 1174 | NA                | 520/654 | NA                                            | After symptom       | RSV              | NPS/NPW(c ulture/PCR)      | RSV infection                     | NA                              | NA              | 28 |  |

|                            |                   |      |                               |   |      |                  |         |                                            |                     |            |                           |                              |                                  |                  |  |    |
|----------------------------|-------------------|------|-------------------------------|---|------|------------------|---------|--------------------------------------------|---------------------|------------|---------------------------|------------------------------|----------------------------------|------------------|--|----|
| 2014[26]                   |                   |      | pr.2012                       |   |      |                  |         |                                            | onset               |            |                           |                              |                                  |                  |  |    |
| Agoritsas et al., 2006[27] | USA               | C.T. | Inf .200 3-2004 and 2004-2005 | 8 | 122  | 5(Y/ Mean)       | 58/64   | Columbus Children's Hos.                   | After symptom onset | INF        | NPS/NS/NP W(culture/PCR)  | Influenza                    | 78%(NS)/85%(NPS)/ 69%(NPW)       | NPS > NS > NPW   |  | 21 |
| Steven et al., 1989[28]    | USA               | C.T. | Jan. - Mar. 1988              | 7 | 32   | NA               | NA      | Johns Hopkins Hos.                         | After symptom onset | RSV        | NB/NPA(IF A/Culture)      | RSV infection                | 100%(NPA)/ 94%(NB)               | NB=NPA           |  | 10 |
| Yoon et al., 2017 [29]     | Republic of Korea | C.S. | Dec.20 14- Apr. 2015          | 7 | 385  | 46(Y/M edian)    | 206/179 | Korea University Guro Hos.                 | After symptom onset | INF        | NPS/ saliva(PCR)          | Influenza                    | 93.5% (NPS)/ 97.1% (Saliva)      | NPS= saliva      |  | 15 |
| Robinson et al., 2013 [30] | Canada            | C.S. | Nov.20 06-Feb .2007           | 7 | 137  | 4.9(M/ Median )  | 75/62   | the Stollery Children ' s Hos.             | After symptom onset | RVs        | TS/Saliva(P CR)           | Respiratory viral infections | 83%(TS)/74%(S aliva)             | TS > Saliva      |  | 7  |
| Bilder et al., 2011[31]    | Israel            | C.T. | Nov. 1- Dec. 2009             | 6 | 26   | 46.6(Y/ Median ) | 14/12   | Rambam Hos.,                               | After symptom onset | H1N1 Virus | NPS/Saliva( PCR)          | H1N1 Virus infection         | 92.3(Saliva)%/ 92.3%(NPS)        | NPS > Saliva     |  | 33 |
| Yoshii et al., 2017[32]    | Japan             | C.T. | Aug. 2012 -Mar. 2014          | 5 | 64   | 55.1(Y/ Mean)    | 41/23   | Jikei UniversityD aisan andTorano mon Hos. | After symptom onset | RVs        | NPS/Sputu m(PCR/cult ure) | Bronchial asthma             | 89.2%(NPS)/60 .7%(Sputum)        | NPS > Sputum     |  | 37 |
| Thea et al.,               | USA               | C.S. | NA                            | 6 | 1114 | NA               | NA      | NA                                         | After symptom       | RVs        | NPS(OPS)/S putum(PCR)     | Pneumonia                    | 92.3%(NPS/OP S)/91.5%(Sput utum) | NPS(OPS)=Sp utum |  | 34 |

|                                 |                       |      |                                   |   |     |                      |         |                                  |                           |              |                                 |                                   |                                               |                      |    |  |
|---------------------------------|-----------------------|------|-----------------------------------|---|-----|----------------------|---------|----------------------------------|---------------------------|--------------|---------------------------------|-----------------------------------|-----------------------------------------------|----------------------|----|--|
| 2017[33]                        |                       |      |                                   |   |     |                      |         |                                  | onset                     |              |                                 |                                   | um)                                           |                      |    |  |
| S ´ alvia<br>etal.,<br>2016[34] | Spain                 | C.T. | Sep.<br>2012 -<br>Aug.<br>2014    | 5 | 368 | 7.43(Y/<br>Mean)     | NA      | Parc Taulí<br>University<br>Hos. | After<br>symptom<br>onset | RVs          | NPS/Sputu<br>m(PCR/cult<br>ure) | Infection with<br>cystic fibrosis | NA                                            | NA                   | 12 |  |
| Azadeh<br>etal.,2015<br>[35]    | USA                   | C.T. | Jun.201<br>3- May<br>2014         | 7 | 86  | 60 (Y/<br>Mean)      | 46/50   | Mayo Clinic                      | After<br>symptom<br>onset | Inf./RS<br>V | NPS/BAL(P<br>CR)                | Respiratory<br>infections         | 57.1%(NPS)/91<br>.4%(BAL)                     | BAL > NPS            | 12 |  |
| Hassan<br>etal.,2018<br>[36]    | USA                   | C.S. | 2015-2<br>016<br>Resp.se<br>ason  | 7 | 497 | NA                   | NA      | NA                               | After<br>symptom<br>onset | RSV          | NPS/VTM-<br>S(DFA)              | RSV infection                     | 98.6%(NPS)/98<br>.6%(VTM-S)                   | NPS=VTM-S            | 26 |  |
| Heikkinen<br>etal.,2001<br>[37] | Finland               | C.T. | Inf.<br>epidem<br>ic of<br>1998-9 | 6 | 101 | 13<br>(M/Me<br>dian) | 48/53   | Turku<br>University<br>Hos.,     | After<br>symptom<br>onset | INF          | NS/NPA(cul<br>ture)             | Influenza                         | 100%(NPA)/91<br>.3%(NS)                       | NS=NPA               | 5  |  |
| Walsh<br>etal.,2008<br>[38]     | USA                   | C.S. | NA                                | 5 | 181 | NA                   | NA      | NA                               | After<br>symptom<br>onset | RVs          | NS/NA/VT<br>M-A(PCR)            | Respiratory<br>viral infections   | 71%(NA)/99%(<br>VTM-S)/92%(<br>VTM-A)         | VTM-S/VTM-<br>A > NA | 9  |  |
| Heikkinen<br>etal.,2002<br>[39] | Finland               | C.S. | Oct.<br>1999 -<br>Jun.<br>2000.   | 7 | 230 | 10<br>(M/Me<br>dian) | 80/150  | Turku<br>University<br>Hos.      | After<br>symptom<br>onset | RVs          | VTM-S/VT<br>M-A                 | Respiratory<br>viral infections   | 92.7%(VTM-A)<br>/80.6%(VTM-S<br>)             | VTM-S=<br>VTM-A      | 17 |  |
| Kim<br>etal.,2016<br>[40]       | Republic of<br>Korea. | C.T. | Nov.20<br>15<br>-Jan.             | 6 | 236 | 22(Y/M<br>edian)     | 136/100 | Anam<br>Hos.of<br>Korea          | After<br>symptom<br>onset | RVs          | NPS/Saliva(<br>PCR)             | Acute<br>respiratory<br>illnesses | NPS=Saliva<br>77.5%( NPS)/7<br>6.3%( saliva ) |                      | 33 |  |

|                            |                   |      |                                       |   |     |                       |         |                                                             |                           |     |                                    |                                      |                                         |               |   |    |
|----------------------------|-------------------|------|---------------------------------------|---|-----|-----------------------|---------|-------------------------------------------------------------|---------------------------|-----|------------------------------------|--------------------------------------|-----------------------------------------|---------------|---|----|
| Jeong et al.,2014 [41]     | Republic of Korea | C.T. | 2016<br>Nov.<br>2012-<br>Mar.<br>2013 | 7 | 154 | 52(Y/M<br>edian)      | 107/47  | University<br>Gachon<br>University<br>Gil Medical<br>Center | After<br>symptom<br>onset | RVs | NPS/Sputu<br>m(PCR)                | Respiratory<br>viral infections      | 53.6%(NPS)/68<br>.2%(Sputum)            | Sputum<br>NPS | > | 16 |
| Ahluwalia et al., 1987[42] | Canada            | C.S. | Jan.<br>-Apr.<br>1986                 | 6 | 32  | 4<br>(M/Me<br>dian)   | NA      | NA                                                          | After<br>symptom<br>onset | RSV | NPA/NPS(C<br>ulture,<br>IFA,ELISA) | RSV infection                        | 69%(NPA)/61%<br>(NPS)                   | NPA=<br>NPS   |   | 26 |
| Spencer et al., 2013[43]   | USA               | C.T. | 2010-2<br>011<br>season<br>al Inf.    | 8 | 268 | 42(Y/<br>Mean)        | 233/35  | NA                                                          | After<br>symptom<br>onset | INF | NPS/OPS/N<br>S(PCR)                | Respiratory<br>specimen<br>influenza | 86.8%(NPS)/86<br>.8%(OPS)/75.5<br>%(NS) | NPS=OPS<br>NS | > | 11 |
| Chan et al., 2008[44]      | China             | C.T. | Feb.<br>-May<br>2007                  | 7 | 196 | 6.3(M/<br>Mean)       | 83/113  | Queen<br>Mary Hos.                                          | After<br>symptom<br>onset | RVs | NPS/NPA<br>(DIF/ PCR)              | Respiratory<br>viral infections      | 94.4%(NPA)/9<br>0%(NPS)                 | NPS=NPA       |   | 16 |
| Frayha et al., 1989[45]    | Canada            | C.S. | NA                                    | 6 | 125 | 10.3<br>(M/<br>Mean)  | NA      | St. Joseph's<br>Hos.                                        | After<br>symptom<br>onset | RVs | NPA/NPS<br>( IFA/Cultu<br>re)      | Viral<br>respiratory<br>disease      | 52.7%(NPA)/5<br>0.6%(NPS)               | NPA=NPS       |   | 20 |
| DeByle et al.,2012 [46]    | USA               | C.S. | Oct.<br>2005 -<br>Sep.<br>2007        | 6 | 314 | 7.3<br>(M/Me<br>dian) | 141/163 | Yukon-Kusk<br>okwim<br>Delta Hos.                           | After<br>symptom<br>onset | RVs | NPS/NW(P<br>CR)                    | Respiratory<br>tract infection       | 90.3%(NW)/76<br>.8%(NPS)                | NPS < NW      |   | 24 |
| Yoshii et al.,2016 [47]    | Japan             | C.T. | Dec.20<br>12-Ma<br>y 2014             | 6 | 92  | 63.3(Y/<br>Mean)      | 33/59   | Jikei<br>University<br>Daisan and<br>Toranomom              | After<br>symptom<br>onset | RVs | NPS/Sputu<br>m(PCR)                | Community-a<br>cquired<br>pneumonia  | 15%(NPS)/10%<br>(Sputum)                | NPS=Sputum    |   | 36 |

|                             |           |      |                      |   |       |                   |                 |                                                        |                     |     |                               |                              |                                   |              |   |    |
|-----------------------------|-----------|------|----------------------|---|-------|-------------------|-----------------|--------------------------------------------------------|---------------------|-----|-------------------------------|------------------------------|-----------------------------------|--------------|---|----|
| Li et al.,2013 [54]         | China     | C.S. | Dec.2011-Dec.2012    | 7 | 103   | 28.9(Y/<br>Mean)  | 60/43           | Hos. 1st affiliated Hos. of Guangzhou university       | After symptom onset | RVs | NPS/OPS/N<br>W(PCR)           | Acute pharyngitis            | 74%(NPS)/44%<br>(OPS)/44%(N<br>W) | NPS > OPS/NW | > | 46 |
| Stensball et al.,2002 [65]  | Denmark   | C.T. | 1996-98              | 6 | 635   | NA                | NA              | National Hos. in Bissau, local health centre in Bandim | After symptom onset | RSV | NPA/NS<br>(ELISA/<br>antigen) | RSV infection                | 97.6%(NPA)/7<br>1.4%(NS)          | NPA > NS     |   | 19 |
| Doorn et al., 2012[66]      | Vietnam   | C.T. | Feb.-Nov. 2010       | 7 | 569   | 25(M/<br>Median ) | 268/301         | Children's Hos.etal                                    | After symptom onset | INF | NS/TS(PCR)                    | Influenza                    | 73.6%(NS)/52.<br>4%(TS)           | NS > TS      |   | 18 |
| Ye et al.,2018 [67]         | China     | C.T. | 2016 May-2017 Apr.   | 6 | 34961 | 3.43(Y/<br>Mean)  | 16108/18<br>851 | Zhejiang University Children ' s Hos.                  | After symptom onset | RVs | NPS/Sputu<br>m                | Respiratory viral infections | 72.5%(NPS)/60<br>.9%(Sputum)      | NPS > Sputum | > | 32 |
| Macfarlane et al., 2005[68] | UK        | C.T. | NA                   | 7 | 88    | 6 (M/<br>Mean)    | NA              | Rotherham General Hos.                                 | After symptom onset | RSV | NS/NPA<br>(IFA)               | Bronchiolitis                | 25%(NS)/37.5%<br>(NPA)            | NPA > NS     |   | 7  |
| Waris et al., 2007[69]      | Finland   | C.T. | Nov. 2003 -Feb. 2004 | 6 | 112   | NA                | NA              | Turku University Hos.                                  | After symptom onset | RSV | NS/NPA(PC<br>R/IFA)           | RSV infection                | 72.3%(NS)/70.<br>5%(NPA)          | NS=NPA       |   | 4  |
| Sung                        | Hong Kong | C.S. | Oct.20               | 7 | 475   | NA                | 222/253         | Prince of                                              | After               | RVs | NPA/NS                        | Acute viral                  | 78.4%(NS)/93%                     | NPA > NS     |   | 5  |



|                                           |                 |      |                                |   |     |                       |       |                                            |                           |     |                           |                                 |                                      |                    |      |  |
|-------------------------------------------|-----------------|------|--------------------------------|---|-----|-----------------------|-------|--------------------------------------------|---------------------------|-----|---------------------------|---------------------------------|--------------------------------------|--------------------|------|--|
| etal.,2009<br>[70]                        |                 |      | 05                             |   |     |                       |       | Wales Hos.                                 | symptom<br>onset          |     | (IFA/<br>culture/PCR<br>) | respiratory<br>infections       | (NPA)                                |                    |      |  |
| Meerhoff<br>etal.,<br>2010[71]            | Netherland<br>s | C.T. | Apr.20<br>06 –<br>Apr.<br>2008 | 7 | 98  | 3.5(M/<br>Median<br>) | 41/57 | University<br>Medical<br>Centre<br>Utrecht | After<br>symptom<br>onset | INF | NS/NPA(PC<br>R)           | Influenza                       | 92%(NPA)/67%(<br>NS)                 | NPA > NS           | 30   |  |
| Pongthan<br>apisith<br>etal.,2012<br>[72] | Thailand        | C.S. | 2009<br>pande<br>mic Inf       | 6 | 210 | 5(Y/Me<br>dian)       | NA    | Ramathibo<br>di Hos.                       | After<br>symptom<br>onset | INF | NPS/Sputu<br>m/TS(PCR)    | Novel<br>swine-origin<br>INF    | 84%(Sputum)/<br>60%(NPS)/36.(<br>TS) | Sputum<br>NPS > TS | > 35 |  |
| Öhrmalm<br>20<br>etal.,2010<br>[73]       | Sweden          | C.S. | Jan.<br>2008<br>-May<br>2009   | 6 | 89  | 55(Y/<br>Mean)        | 13/55 | Karolinska<br>University<br>Hos.           | After<br>symptom<br>onset | RVs | NS/NPA(PC<br>R)           | Respiratory<br>tract<br>viruses | 90%(NPA)/65%<br>(NS)                 | NPA > NS           | 18   |  |

Abbreviation: NPS=Nasopharyngeal swabs;NS=Nasal swab; MTS=Mid-turbinate swab;OPS=Oropharyngeal swab;TS=Throat swab;TS=Nose-Throat swab; NPA=Nasopharyngeal aspirate;NA=Nasal aspirate;NW=Nasopharyngeal wash; NS=Nasal wash;NB=Nasal brush;BAL=Bronchoalveolar Lavage;VTM-S=Swab with viral transport medium; VTM-A=Aspirate with viral transport medium;RVs=Respiratory viruses;INF=Influenza virus; INFa=Influenza a;INFb=Influenza b;RV=Rhinovirus;RSV=Respiratory syncytial virus; PIV=Parainfluenza virus;ADV=Adenovirus;COV=Coronavirus;NA=Not applicable.
